# Supplementary material for: Development of Ethyl Methanesulfonate Mutant Edamame Soybean (Glycine max (L.) Merr.) Populations and Forward and Reverse Genetic Screening for Early-Flowering Mutants
Source: MDPI journal article supplement (doi:10.3390/plants11141839), 2022-07-13
Supplement: s1 [file s1]

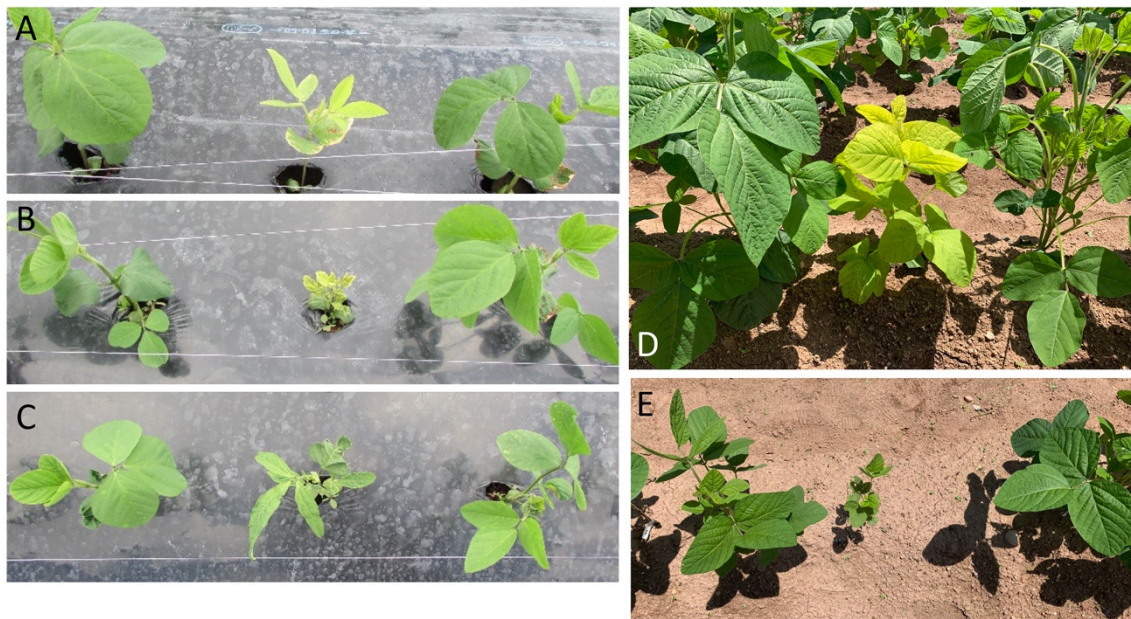

Figure S1

Phenotypes of the early growth stage of the Hiden M<sub>2</sub> populations (A, D) individuals with yellow-green leaves (B, E) individuals with dwarf and semi-dwarf (C) individual with abnormal leaf morphology.

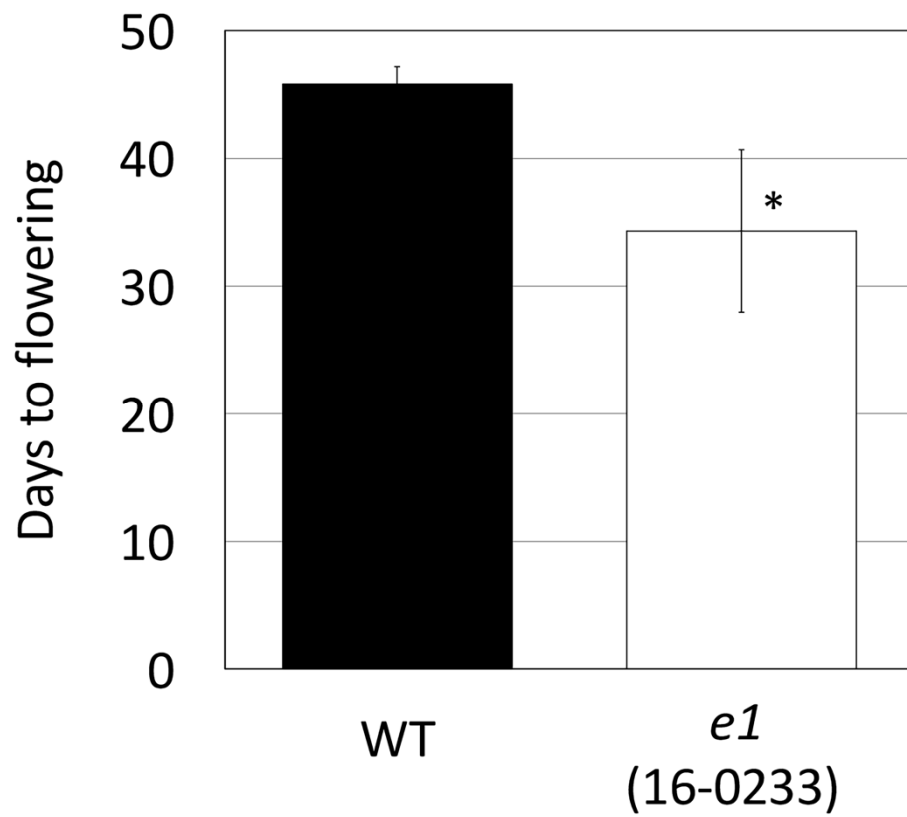

Figure S2

Days to flowering for the wild type and *e1* (16-0233) mutants sown in early June grown in plastic pots in a glass room. Data are expressed as the average with standard deviation (n = 10). \* Student's t-test,  $*p < 0.01$ .
